# Supplementary material
Source: MDPI journal article supplement (https://www.mdpi.com/1424-2818/14/2/146)
Supplement: s1 [file s1]

Archive with 6 entries (6 files):
- Figure S1 freq_SNP.tif
- Figure S2 CV error.tif
- Figure S3 Nei's distance.tif
- Table S1.pdf
- Table S2.pdf
- Table S3 Fst.xlsx
