# Supplementary material
Source: MDPI journal article supplement (https://www.mdpi.com/1424-2818/14/2/146)
Supplement: s1 [file s1 › Table S1.pdf]

**Table S1.** Details of geographical locations, altitude and effective sizes of natural populations of *C. spinosa*.

| Code                                                   | Pop. Locality              | Longitude      | Latitude       | Altitude (m) | Ne    |
|--------------------------------------------------------|----------------------------|----------------|----------------|--------------|-------|
| Group WH (Western Himalayas)                           |                            |                |                |              |       |
| C01                                                    | Zabrang, Tibet, China      | 79°37'29.19" E | 31°30'04.12" N | 3612 m       | <50   |
| C02                                                    | Sarang, Tibet, China       | 79°03'24.54" E | 31°33'37.94" N | 3500 m       | <1000 |
| C03                                                    | Diya, Tibet, China         | 78°52'14.29" E | 31°47'06.15" N | 2989 m       | <2000 |
| Group EP (Eastern Pamirs)                              |                            |                |                |              |       |
| C04                                                    | Taxkorgan, Xinjiang, China | 75°52'16.33" E | 37°50'57.21" N | 2855 m       | >2000 |
| C05                                                    | Akto, Xinjiang, China      | 75°34'18.22" E | 39°02'28.16" N | 2435 m       | >2000 |
| C06                                                    | Yengisar, Xinjiang, China  | 76°07'03.32" E | 38°34'31.72" N | 1966 m       | >2000 |
| C07                                                    | Yecheng, Xinjiang, China   | 76°53'23.16" E | 37°42'49.90" N | 1806 m       | <200  |
| C08                                                    | Wuqia, Xinjiang, China     | 75°40'17.50" E | 39°44'18.00" N | 1945 m       | >1000 |
| C09                                                    | Artux, Xinjiang, China     | 76°37'58.33" E | 39°50'25.82" N | 1230 m       | >2000 |
| C10                                                    | Jiashi, Xinjiang, China    | 78°00'48.70" E | 39°55'44.00" N | 1162 m       | >2000 |
| Group WT (Western Tianshan Mountains)                  |                            |                |                |              |       |
| K02                                                    | Almaty, Kazakhstan         | 78°45'29.16" E | 44°10'46.20" N | 1010 m       | <1500 |
| K01                                                    | Bishkek, Kyrgyzstan        | 74°40'33.96" E | 42°41'10.32" N | 1388 m       | <1000 |
| U01                                                    | Osh, Kyrgyzstan            | 72°46'59.52" E | 40°31'42.96" N | 1072 m       | <1500 |
| U02                                                    | Batken, Kyrgyzstan         | 72°05'27.24" E | 40°02'24.36" N | 1267 m       | <1500 |
| T01                                                    | Nurek, Khatlon, Tajikistan | 69°14'02.73" E | 38°21'21.35" N | 954 m        | <1500 |
| C30                                                    | Bole, Xinjiang, China      | 82°04'14.70" E | 44°44'07.50" N | 565 m        | <1000 |
| C31                                                    | Yining, Xinjiang, China    | 82°12'59.44" E | 43°35'53.22" N | 766 m        | <400  |
| C32                                                    | Gongliu, Xinjiang, China   | 81°50'13.79" E | 43°36'54.46" N | 707 m        | <500  |
| Group ST (the southern piedmont of Tianshan Mountains) |                            |                |                |              |       |
| C11                                                    | Tumxuk, Xinjiang, China    | 79°31'55.51" E | 39°56'23.18" N | 1069 m       | >2000 |
| C12                                                    | Kalpin, Xinjiang, China    | 78°56'01.30" E | 40°13'43.82" N | 1104 m       | >3000 |
| C13                                                    | Wensu, Xinjiang, China     | 79°51'43.36" E | 41°30'16.08" N | 1314 m       | >2000 |
| C14                                                    | Baicheng, Xinjiang, China  | 83°02'55.14" E | 41°58'58.68" N | 1371 m       | >3000 |
| C15                                                    | Lunnan, Xinjiang, China    | 84°01'16.73" E | 41°29'33.12" N | 928 m        | >3000 |
| C16                                                    | Korla, Xinjiang, China     | 85°59'43.12" E | 41°49'58.15" N | 997 m        | >3000 |
| C17                                                    | Hejing, Xinjiang, China    | 86°18'37.41" E | 42°23'32.52" N | 1209 m       | >3000 |
| Group NT (the northern piedmont of Tianshan Mountains) |                            |                |                |              |       |
| C24                                                    | Jimsar, Xinjiang, China    | 89°07' E       | 43°55' N       | 945 m        | >2000 |
| C25                                                    | Urumqi, Xinjiang, China    | 87°07'38.49" E | 43°43'34.08" N | 1227 m       | >3000 |
| C26                                                    | Manas, Xinjiang, China     | 86°07'54.40" E | 44°11'18.20" N | 642 m        | >3000 |
| C27                                                    | Shihezi, Xinjiang, China   | 86°08'12.99" E | 44°16'03.37" N | 518 m        | >3000 |
| C28                                                    | Shawan, Xinjiang, China    | 85°35'10.61" E | 44°18'07.91" N | 577 m        | >3000 |
| C29                                                    | Wusu, Xinjiang, China      | 84°18'59.02" E | 44°18'37.71" N | 688 m        | >3000 |
| Group ET (Eastern Tianshan Mountains)                  |                            |                |                |              |       |
| C18                                                    | Toksun, Xinjiang, China    | 88°36'30.50" E | 42°51'41.78" N | 32 m         | <200  |
| C19                                                    | Turpan, Xinjiang, China    | 89°09'52.68" E | 42°52'59.45" N | -74 m        | >1500 |
| C20                                                    | Shanshan, Xinjiang, China  | 90°39'29.95" E | 43°01'27.46" N | 483 m        | >1500 |
| C21                                                    | Hami, Xinjiang, China      | 94°08'56.15" E | 42°31'16.51" N | 773 m        | <100  |
| C22                                                    | Dunhuang, Gansu, China     | 94°56'48.61" E | 40°29'17.22" N | 1068 m       | <100  |

|     |                       |                |                |        |      |
|-----|-----------------------|----------------|----------------|--------|------|
| C23 | Guazhou, Gansu, China | 95°34'22.29" E | 40°21'50.70" N | 1129 m | <500 |
|-----|-----------------------|----------------|----------------|--------|------|

---

*N<sub>e</sub>*, effective population size.
