# Supplementary material
Source: MDPI journal article supplement (https://www.mdpi.com/1424-2818/14/2/146)
Supplement: s1 [file s1 › Table S2.pdf]

**Table S2.** Digestion sites of several common or rare restriction enzymes, as well as their combinations for screening schemes in this study.

| Restriction Enzymes | Digestion Sites (5'-3') | No. | Combinations of Enzyme Digestion |
|---------------------|-------------------------|-----|----------------------------------|
| <i>EcoRI</i>        | G ↓ AATTC               | 1   | <i>EcoRI</i> + <i>BfaI</i>       |
| <i>HindIII</i>      | A ↓ AGCTT               | 2   | <i>EcoRI</i> + <i>MspI</i>       |
| <i>PstI</i>         | CTGCA ↓ G               | 3   | <i>HindIII</i> + <i>BfaI</i>     |
| <i>BfaI</i>         | C ↓ TAG                 | 4   | <i>HindIII</i> + <i>MspI</i>     |
| <i>MspI</i>         | C ↓ CGG                 | 5   | <i>PstI</i> + <i>BfaI</i>        |
| <i>DpnII</i>        | ↓ GATC                  | 6   | <i>PstI</i> + <i>MspI</i>        |
|                     |                         | 7   | <i>BfaI</i> + <i>DpnII</i>       |
