# Supplementary material
Source: MDPI journal article supplement (https://www.mdpi.com/1424-2818/14/2/146)
Supplement: s1 [file s1 › Table S3 Fst.xlsx]

## Sheet: Fst_summary
	C01	C02	C03	C04	C05	C06	C07	C08	C09	C10	C11	C12	C13	C14	C15	C16	C17	C18	C19	C20	C21	C22	C23	C24	C25	C26	C27	C28	C29	C30	C31	C32	U01	U02	K02	T01	K01
C01		0.187812	0.135656	0.293866	0.358906	0.339391	0.410428	0.368701	0.324793	0.343127	0.446939	0.386481	0.414068	0.39807	0.473073	0.401343	0.42003	0.511001	0.449916	0.43175	0.476263	0.506096	0.427354	0.429545	0.385263	0.391628	0.374661	0.421597	0.367928	0.399956	0.449092	0.437952	0.63887	0.616387	0.649256	0.612778	0.665622
C02			0.0770575	0.226905	0.300647	0.275529	0.363769	0.308026	0.260201	0.283322	0.396384	0.329651	0.362449	0.339413	0.428196	0.346295	0.369131	0.47592	0.399832	0.380335	0.431008	0.473034	0.374257	0.379278	0.327659	0.333035	0.316839	0.371001	0.308656	0.346397	0.397298	0.383373	0.668937	0.645372	0.67782	0.640865	0.706648
C03				0.267419	0.323959	0.307542	0.361838	0.334985	0.299532	0.311849	0.408094	0.355596	0.380073	0.369887	0.433468	0.370583	0.384467	0.46428	0.414458	0.398222	0.435921	0.457026	0.394031	0.39376	0.355987	0.364052	0.348724	0.387201	0.341317	0.36723	0.411709	0.403156	0.536795	0.513394	0.538553	0.503549	0.552384
C04					0.0942396	0.0896504	0.0978539	0.105013	0.0923121	0.103382	0.181549	0.152941	0.171236	0.177758	0.205419	0.174418	0.179248	0.220071	0.205606	0.19527	0.212157	0.204365	0.190602	0.180041	0.164814	0.176422	0.15973	0.173851	0.157862	0.15917	0.183252	0.179031	0.150367	0.133193	0.159798	0.128082	0.157408
C05						0.0949987	0.137301	0.101629	0.0850907	0.100355	0.179978	0.151419	0.167122	0.176528	0.212763	0.176189	0.183064	0.241907	0.215077	0.202837	0.219945	0.222201	0.1933	0.183963	0.158075	0.167689	0.15113	0.171098	0.148238	0.145065	0.172255	0.16702	0.164457	0.148528	0.173961	0.150213	0.180971
C06							0.126821	0.10627	0.089931	0.100179	0.181651	0.152617	0.170532	0.177988	0.210703	0.177697	0.181959	0.233555	0.212183	0.201121	0.218939	0.214314	0.193068	0.185771	0.163892	0.172625	0.15612	0.17374	0.152967	0.15204	0.176955	0.173378	0.162226	0.142035	0.166376	0.141896	0.171155
C07								0.145036	0.123131	0.13686	0.228566	0.186579	0.209024	0.205963	0.260406	0.208668	0.220816	0.289155	0.251057	0.235163	0.265682	0.27659	0.228735	0.227931	0.193328	0.202611	0.18682	0.217266	0.180397	0.196189	0.227982	0.217993	0.275681	0.257347	0.283711	0.249092	0.29811
C08									0.0863582	0.101324	0.180835	0.151327	0.170155	0.174245	0.208438	0.174669	0.182173	0.235362	0.213066	0.202148	0.220255	0.21809	0.192312	0.183977	0.158363	0.167916	0.151674	0.170504	0.148533	0.146409	0.172162	0.166582	0.16538	0.144621	0.173438	0.147968	0.176132
C09										0.0815864	0.156519	0.131427	0.145675	0.156228	0.184039	0.155752	0.161659	0.206824	0.191615	0.180617	0.19089	0.18907	0.173168	0.158995	0.142077	0.150079	0.135818	0.1524	0.1336	0.127506	0.150777	0.145976	0.126137	0.109618	0.133387	0.111846	0.133272
C10											0.15274	0.121059	0.134524	0.146933	0.180151	0.144726	0.148919	0.1995	0.179961	0.169006	0.187811	0.186117	0.165913	0.156224	0.137391	0.147859	0.131762	0.150792	0.130154	0.135014	0.161607	0.157521	0.152121	0.135672	0.156309	0.132622	0.161402
C11												0.141586	0.151192	0.161793	0.205367	0.158598	0.167389	0.222311	0.196538	0.183519	0.21073	0.213185	0.181752	0.180379	0.155816	0.167155	0.152622	0.177053	0.147125	0.193263	0.223974	0.219882	0.251692	0.232734	0.258268	0.231227	0.263448
C12													0.100259	0.111121	0.142294	0.107852	0.115046	0.15948	0.137058	0.131899	0.157604	0.1569	0.135292	0.129959	0.114126	0.125025	0.111487	0.129733	0.114791	0.160649	0.193939	0.188943	0.18274	0.172066	0.195896	0.169344	0.193475
C13														0.123771	0.160491	0.119082	0.130442	0.18687	0.159407	0.153492	0.177901	0.180472	0.151348	0.144074	0.125417	0.137406	0.1217	0.141712	0.124443	0.167074	0.198564	0.194422	0.206922	0.200912	0.220453	0.19692	0.220886
C14															0.136088	0.102217	0.112343	0.146513	0.134408	0.12886	0.152597	0.154853	0.138625	0.134491	0.121002	0.13277	0.119782	0.138216	0.122737	0.177022	0.209861	0.20225	0.19028	0.181653	0.209377	0.179202	0.196041
C15																0.128414	0.150209	0.194793	0.169089	0.16337	0.195388	0.205783	0.169018	0.169733	0.146301	0.159484	0.142604	0.17319	0.148595	0.212982	0.25374	0.243005	0.282027	0.26877	0.300549	0.269017	0.292538
C16																	0.0968381	0.133969	0.117029	0.114763	0.142913	0.143933	0.123397	0.12358	0.110223	0.125595	0.10853	0.129733	0.115192	0.177404	0.217982	0.211358	0.203522	0.189219	0.214913	0.189548	0.209792
C17																		0.129272	0.10757	0.104042	0.138741	0.14362	0.118622	0.126782	0.114637	0.12877	0.11583	0.136992	0.11882	0.189054	0.230389	0.224844	0.233871	0.217658	0.241698	0.2141	0.24268
C18																			0.110718	0.116309	0.170229	0.192084	0.146533	0.169341	0.155301	0.169888	0.160693	0.191592	0.162839	0.25271	0.300536	0.291283	0.371457	0.350337	0.389149	0.343591	0.381218
C19																				0.0884177	0.142738	0.148791	0.124705	0.143334	0.140441	0.153574	0.142585	0.16698	0.147885	0.229789	0.272865	0.266135	0.282519	0.260878	0.294828	0.254169	0.289487
C20																					0.126276	0.13808	0.113649	0.136687	0.130925	0.145998	0.133735	0.152948	0.136625	0.214616	0.25642	0.250771	0.252703	0.235547	0.268885	0.229366	0.262565
C21																						0.179959	0.143612	0.16185	0.152073	0.164326	0.150953	0.178283	0.152388	0.226014	0.271195	0.262936	0.295544	0.281484	0.310199	0.277678	0.312688
C22																							0.110885	0.166326	0.147739	0.156765	0.139713	0.168956	0.140048	0.227099	0.275324	0.266006	0.341091	0.323291	0.355331	0.322335	0.368184
C23																								0.139077	0.12493	0.136762	0.12177	0.138976	0.123675	0.198701	0.24052	0.235105	0.230343	0.216823	0.2459	0.213967	0.243483
C24																									0.118056	0.129219	0.11391	0.138396	0.11587	0.179741	0.220703	0.214124	0.224889	0.215836	0.241265	0.211116	0.239537
C25																										0.0968975	0.0825928	0.100837	0.0891417	0.149091	0.186997	0.183476	0.162802	0.157581	0.179175	0.158917	0.175286
C26																											0.0821849	0.104158	0.0937268	0.153438	0.192627	0.187681	0.161321	0.160979	0.176406	0.161466	0.18146
C27																												0.083909	0.075556	0.138499	0.176971	0.172225	0.142615	0.142099	0.155936	0.144428	0.167848
C28																													0.0894566	0.158305	0.199197	0.193086	0.191605	0.190157	0.205627	0.191876	0.22416
C29																														0.129923	0.164623	0.158418	0.133991	0.135633	0.151276	0.133107	0.155728
C30																															0.112751	0.108165	0.134011	0.138343	0.147257	0.142227	0.151815
C31																																0.0826915	0.16336	0.175457	0.178617	0.178216	0.186439
C32																																	0.149775	0.16254	0.170808	0.162597	0.169
U01																																		0.490019	0.506914	0.513539	0.611049
U02																																			0.523106	0.480372	0.582152
K02																																				0.54957	0.650711
T01																																					0.602905
